# Supplementary material for: Structural and magnetic variability of cobalt(II) complexes with bridging pyrazolate ligands bearing appended imine groups
Source: Royal Society of Chemistry journal article supplement (doi:10.1039/b907817g), 2009-01-01
Supplement: b907817g.pdf [file b907817g.pdf]

## **Structural and Magnetic Variability of Cobalt(II) Complexes with Bridging Pyrazolate Ligands Bearing Appended Imine Groups**

**Anna Sachse, Serhiy Demeshko and Franc Meyer\***

*Institut für Anorganische Chemie, Georg-August-Universität Göttingen, 37073 Göttingen, Germany. Fax: (+) 551-39-3063; Tel: (+) 551-39-3012; E-mail: franc.meyer@chemie.uni-goettingen.de*

| <b>HL<sup>3</sup></b>                                         |                                                |
|---------------------------------------------------------------|------------------------------------------------|
| Empirical formula                                             | C <sub>47</sub> H <sub>50</sub> N <sub>4</sub> |
| Formula weight                                                | 670.51                                         |
| crystal size [mm]                                             | 0.78 x 0.75 x 0.11                             |
| crystal system                                                | Monoclinic                                     |
| space group                                                   | P2 <sub>1</sub> /c (No. 14)                    |
| <i>a</i> [Å]                                                  | 25.819(5)                                      |
| <i>b</i> [Å]                                                  | 8.1503(16)                                     |
| <i>c</i> [Å]                                                  | 24.549(5)                                      |
| $\alpha$ [°]                                                  | 90                                             |
| $\beta$ [°]                                                   | 116.88(3)                                      |
| $\gamma$ [°]                                                  | 90                                             |
| <i>V</i> [Å <sup>3</sup> ]                                    | 4607.8(16)                                     |
| <i>Z</i>                                                      | 4                                              |
| $\rho_{\text{calc}}$ [g cm <sup>-3</sup> ]                    | 0.967                                          |
| F(000)                                                        | 1440                                           |
| $\mu$ [mm <sup>-1</sup> ]                                     | 0.056                                          |
| <i>hkl</i> range                                              | 31±, -8 to 10±, ±30                            |
| $\theta$ range [°]                                            | 1.66 to 25.92                                  |
| measured refl.                                                | 38404                                          |
| unique refl. [ <i>R</i> <sub>int</sub> ]                      | 8898[0.2351]                                   |
| observed refl. ( <i>I</i> > 2 $\sigma$ ( <i>I</i> ))          | 3093                                           |
| ref. param. / restraints                                      | 213/0                                          |
| goodness-of-fit                                               | 1.353                                          |
| <i>R</i> 1, <i>wR</i> 2 ( <i>I</i> > 2 $\sigma$ ( <i>I</i> )) | 0.2291, 0.4933                                 |
| <i>R</i> 1, <i>wR</i> 2 (all data)                            | 0.3524, 0.5584                                 |
| resid. el. dens. [e Å <sup>-3</sup> ]                         | 2.682/-0.635                                   |

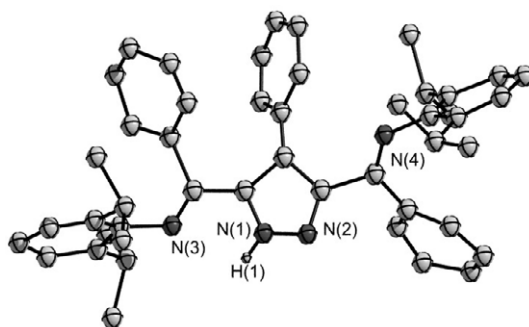

**Fig. S1.** Molecular structure of HL<sup>3</sup>. In the interest of clarity most hydrogen atoms have been omitted.

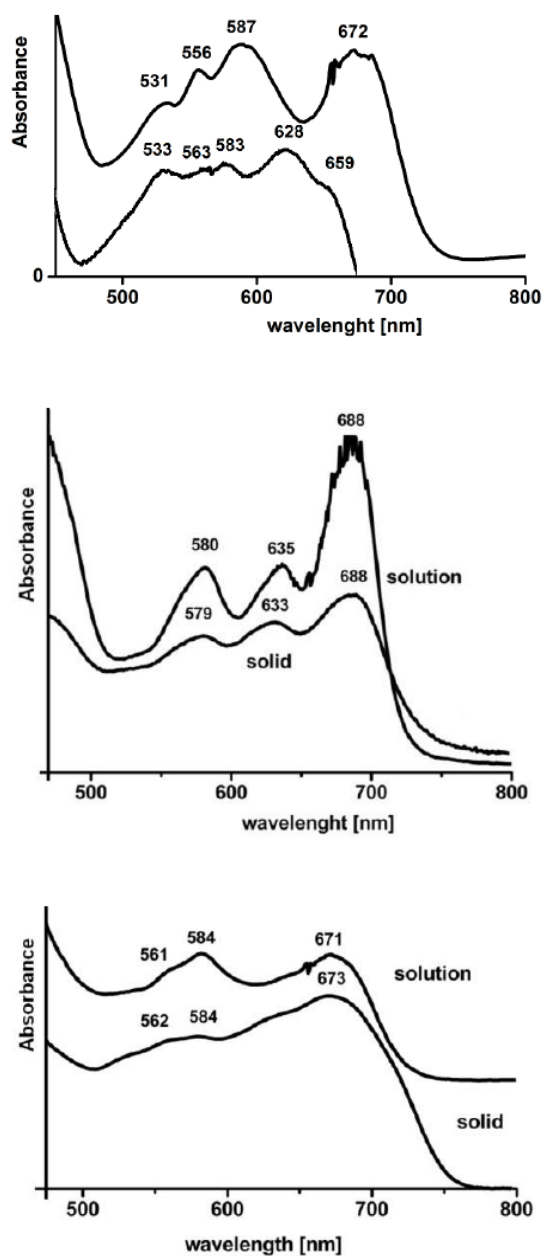

**Fig. S2.** Part of the UV-Vis spectra of **1** (top), **2** (middle) and **3** (bottom) in the solid state (diffuse reflectance) and in  $\text{CH}_2\text{Cl}_2$  solutions.

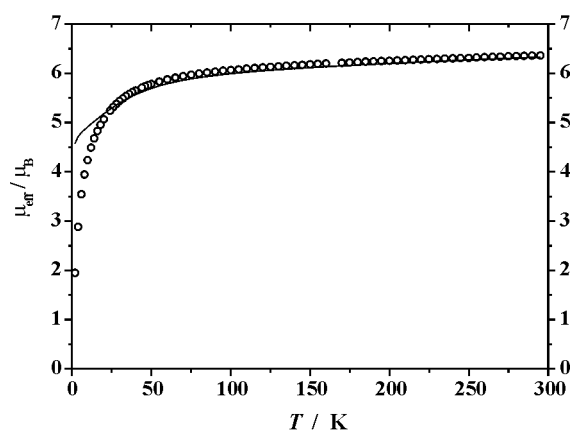

**Fig. S3.**  $\mu_{\text{eff}}$  vs.  $T$  plot for **1**. The solid line represents the calculated curve fit when coupling constant  $J$  is excluded. Best fit parameters for **1** are  $g = 2.20$ ,  $|D| = 40 \text{ cm}^{-1}$ ,  $PI = 2.5 \%$  (fixed) and  $TIP = 19.0 \times 10^{-4} \text{ cm}^3 \text{ mol}^{-1}$  (fixed).

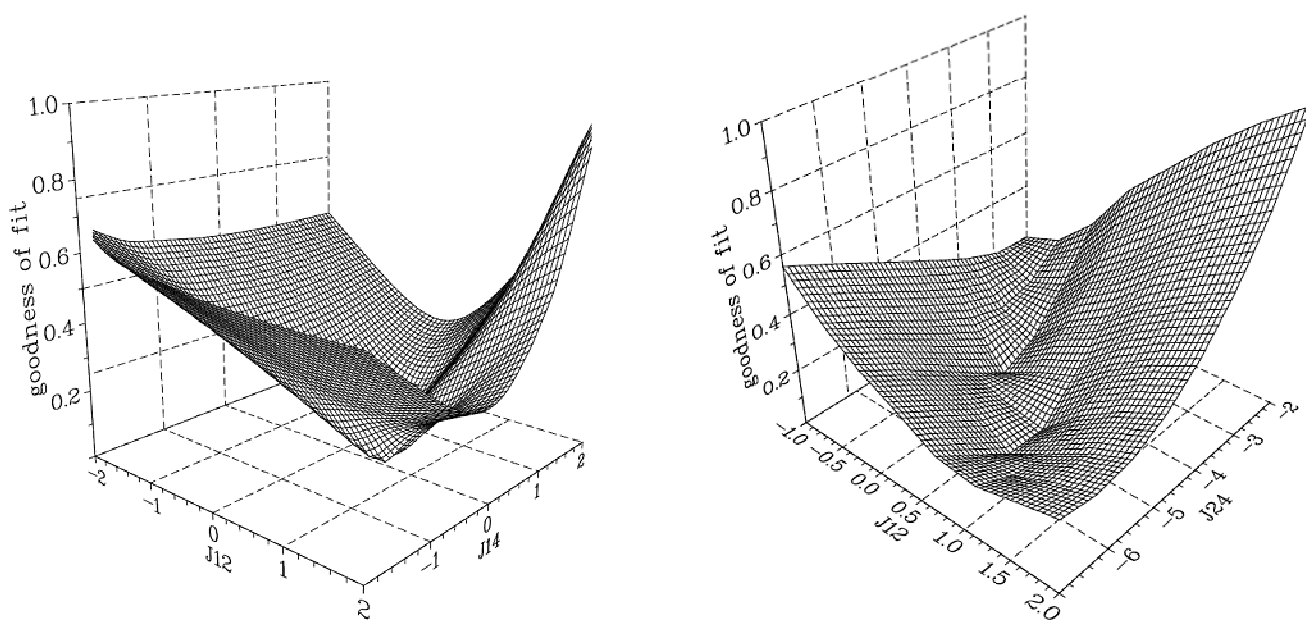

**Fig. S4.** The 3D error surfaces for the pairs  $J_2$ - $J_3$  (left) and  $J_1$ - $J_2$  (right).
